# Supplementary material
Source: publisher figshare collection journal article supplement (https://springernature.figshare.com/ndownloader/files/14875877)
Supplement: Supplementary file [file 14875877]

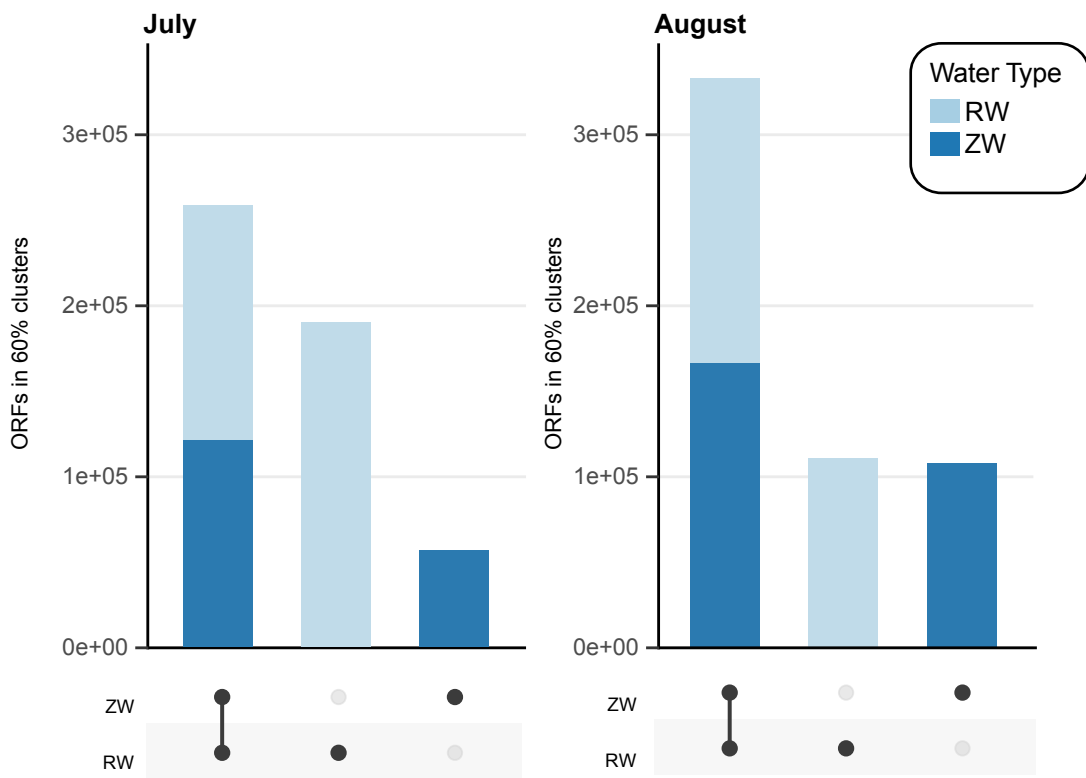

**Figure S1:** ORF clustering reveals unique and shared functional content in paired reclaimed water (RW) and ZVI sand filtered reclaimed water (ZW) samples from July and August. Bars denote the number of ORFs from each sample type contained within 60% similarity peptide clusters. Single bars depict the unique ORFs that clustered within water type, while stacked bars depict the ORFs that clustered between water types (e.g. shared ORFs).
